# Supplementary material for: PHGDH supports liver ceramide synthesis and sustains lipid homeostasis
Source: PubMed Central journal article supplement (PMC7294658; doi:10.1186/s40170-020-00212-x), 2020-06-15
Supplement: 40170_2020_212_MOESM3_ESM.pdf [file 40170_2020_212_MOESM3_ESM.pdf]

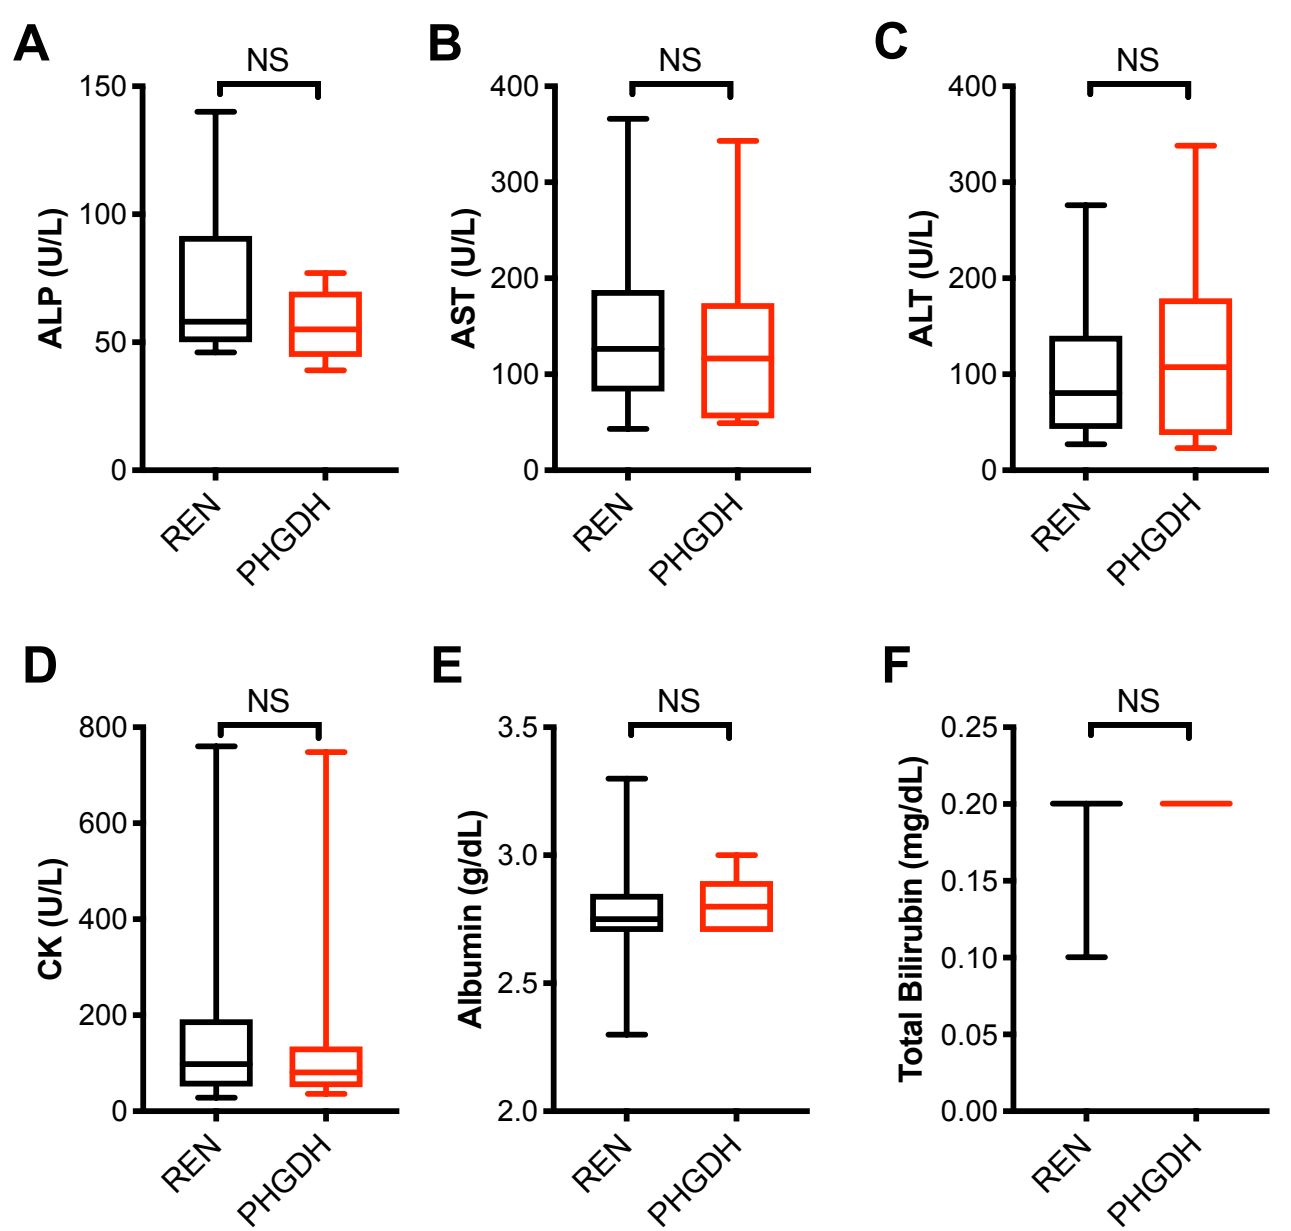

Supplementary Figure 3
